# Supplementary material for: Controllable synthesis of ultrasmall CuInSe2 quantum dots for photovoltaic application
Source: Royal Society of Chemistry journal article supplement (doi:10.1039/c4ra04727c), 2014-01-01
Supplement: c4ra04727c1.pdf [file c4ra04727c1.pdf]

## Electronic Supplementary Information

### Controllable Synthesis of Ultrasmall CuInSe<sub>2</sub> Quantum Dots for Photovoltaic Application

Chao-Feng Du<sup>1,2</sup>, Ting You<sup>2,3\*</sup>, Lei Jiang<sup>2</sup>, Song-Qiu Yang<sup>2</sup>, Kun Zou<sup>1</sup>, Ke-Li Han<sup>2</sup> and Wei-Qiao Deng<sup>2\*</sup>

<sup>1</sup> Hubei Key Laboratory of Natural Products Research and Development, College of Chemistry and Life Sciences, China Three Gorges University, Yichang 443002, China.

<sup>2</sup> State Key Laboratory of Molecular Reaction Dynamics, Dalian Institute of Chemical Physics, Chinese Academy of Sciences; Dalian National Laboratory for Clean Energy, Dalian 116023, P. R. China.

<sup>3</sup> International Energy Research Center, Shanghai Jiaotong University, Shanghai 200030, China.

**Table S1** Fitted Biexponential Values for CdS/SiO<sub>2</sub>, CdS/TiO<sub>2</sub> and CdS/CuInSe<sub>2</sub>/TiO<sub>2</sub> Films of Time-Resolved Transient Absorption Bleaching Recovery.

| Sample                                    | y <sub>0</sub> | a <sub>1</sub> | τ <sub>1</sub> (ps) | a <sub>2</sub> | τ <sub>2</sub> (ps) | <τ> (ps) | K <sub>et</sub> (s <sup>-1</sup> ) |
|-------------------------------------------|----------------|----------------|---------------------|----------------|---------------------|----------|------------------------------------|
| CdS/SiO <sub>2</sub>                      | -0.017         | -0.19±0.009    | 17.9±0.2            | -0.26±0.0170   | 194.8±13.5          | 183      |                                    |
| CdS/TiO <sub>2</sub>                      | -0.092         | -0.20±0.0035   | 9.1±0.4             | -0.14±0.0035   | 117.8±6.9           | 107      | 2.97×10 <sup>9</sup>               |
| CdS/CuInSe <sub>2</sub> /TiO <sub>2</sub> | -0.0062        | -0.92±0.028    | 7.0±0.4             | -0.49±0.0285   | 80.8±10.0           | 70       | 7.92×10 <sup>9</sup>               |

\* To whom the correspondence should be addressed.

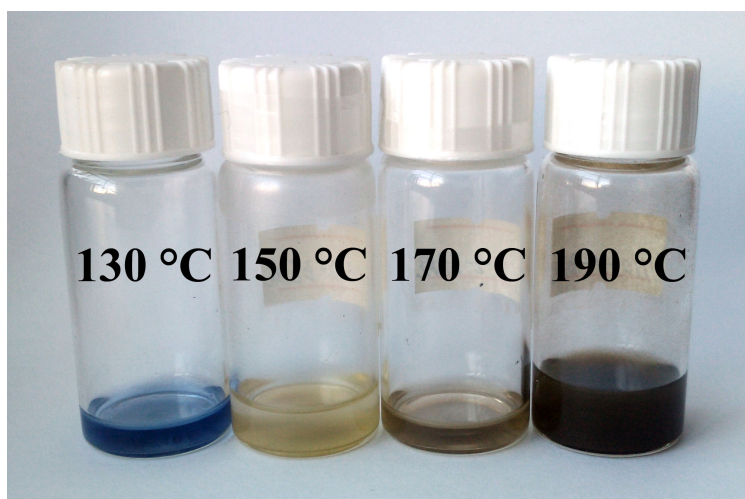

**Fig. S1** Colors of CuInSe<sub>2</sub> quantum dots synthesized at different temperatures

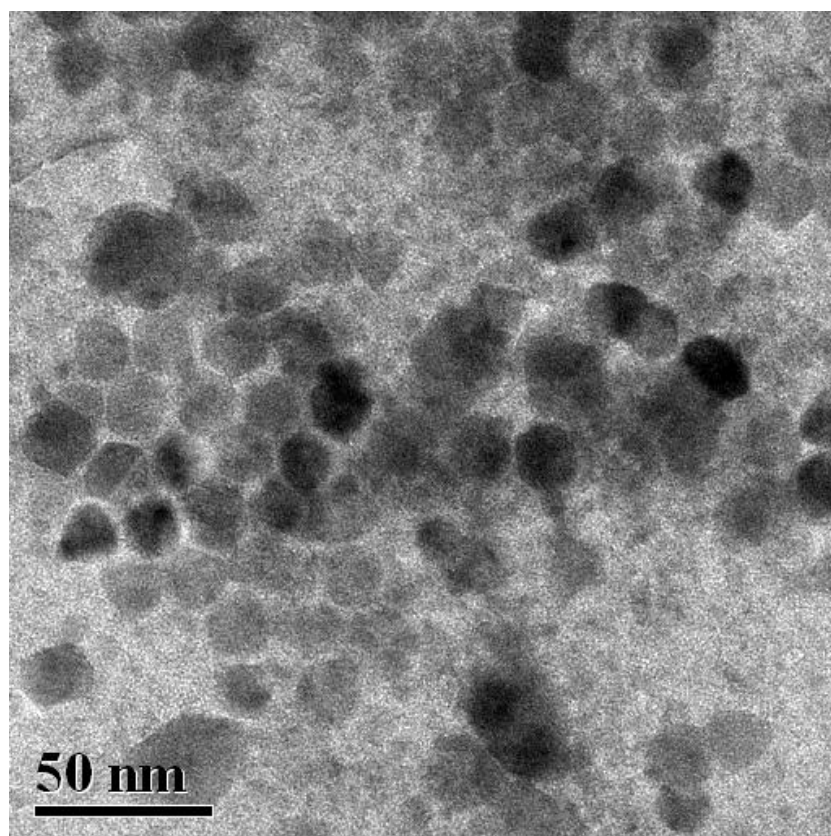

**Fig. S2** TEM image of CuInSe<sub>2</sub> quantum dots synthesized at 190 °C

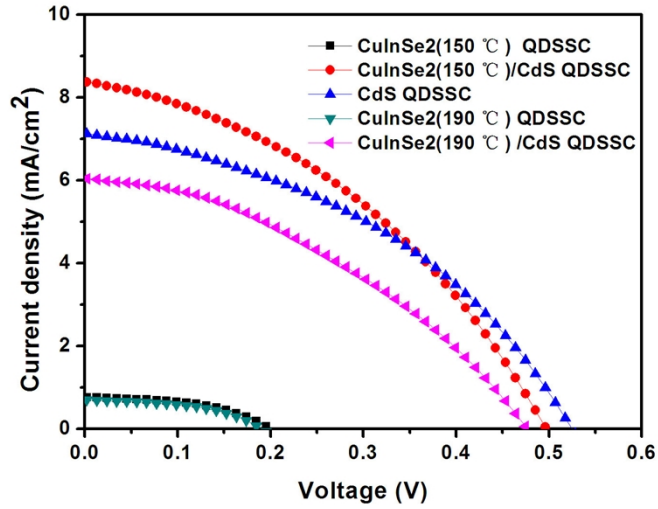

**Fig. S3** I-V characteristics of QDSSCs for CuInSe<sub>2</sub>, CdS, and CdS/CuInSe<sub>2</sub> QD-sensitized TiO<sub>2</sub> electrodes measured under the illumination of one sun (AM 1.5G, 100 mW cm<sup>-2</sup>).

**Table S2** Results obtained from the photocurrent-voltage (*I-V*) measurements of the QDSSCs using various electrodes.

| Sample                                | $V_{oc}$ (V) | $J_{sc}$ (mA cm <sup>-2</sup> ) | FF(%) | $\eta$ □ □ %<br>□ |
|---------------------------------------|--------------|---------------------------------|-------|-------------------|
| CuInSe <sub>2</sub> (150°C) QDSSC     | 0.200        | 0.76                            | 49.0  | 0.07              |
| CuInSe <sub>2</sub> (190°C) QDSSC     | 0.190        | 0.69                            | 49.3  | 0.06              |
| CdS QDSSC                             | 0.524        | 7.43                            | 39.3  | 1.53              |
| CdS/CuInSe <sub>2</sub> (150°C) QDSSC | 0.496        | 8.69                            | 37.8  | 1.63              |
| CdS/CuInSe <sub>2</sub> (190°C) QDSSC | 0.475        | 6.13                            | 37.8  | 1.10              |
